# Supplementary material for: Se Alleviated Pb-Caused Neurotoxicity in Chickens: SPS2-GPx1-GSH-IL-2/IL-17-NO Pathway, Selenoprotein Suppression, Oxidative Stress, and Inflammatory Injury
Source: MDPI journal article supplement (doi:10.3390/antiox13030370), 2024-03-18
Supplement: s1 [file s1]

Table S1 The composition of chicken standard commercial diet in our experiment.

|                          | 1-28 days | 29-97 days |
|--------------------------|-----------|------------|
| crude protein (%)        | 20.5      | 19.3       |
| moisture (%)             | 12        | 13.4       |
| crude fiber (%)          | 4.3       | 5.5        |
| crude ash (%)            | 6.8       | 7.8        |
| calcium (%)              | 0.89      | 0.83       |
| total phosphorous (%)    | 0.64      | 0.62       |
| sodium chloride (%)      | 0.35      | 0.38       |
| copper (mg/kg)           | 9.45      | 9.45       |
| iron (mg/kg)             | 75.5      | 75.5       |
| zinc (mg/kg)             | 45.15     | 45.15      |
| manganese (mg/kg)        | 115.41    | 115.41     |
| iodine (mg/kg)           | 0.46      | 0.46       |
| selenium (mg/kg)         | 0.49      | 0.49       |
| vitamin A (IU)           | 2750      | 2750       |
| vitamin D3 (IU)          | 410       | 410        |
| vitamin E (mg/kg)        | 12        | 12         |
| vitamin K (mg/kg)        | 0.6       | 0.6        |
| vitamin B1 (mg/kg)       | 1.7       | 1.7        |
| vitamin B2 (mg/kg)       | 7.8       | 4          |
| vitamin B12 (mg/kg)      | 0.01      | 0.01       |
| nicotinic acid (mg/kg)   | 31        | 31         |
| folic acid (mg/kg)       | 0.62      | 0.62       |
| pantothenic acid (mg/kg) | 11.5      | 11.5       |
| biotin (mg/kg)           | 0.17      | 0.17       |
